# Supplementary material for: Urate and Nonanoate Mark the Relationship between Sugar-Sweetened Beverage Intake and Blood Pressure in Adolescent Girls: A Metabolomics Analysis in the ELEMENT Cohort
Source: PubMed Central journal article supplement (PMC6572261; doi:10.3390/metabo9050100), 2019-05-17
Supplement: metabolites-09-00100-s001.pdf [file metabolites-09-00100-s001.pdf]

**Table S1** Descriptive statistics of age, metabolic outcomes, and pubertal status for 242 ELEMENT participants.

|                                           | Girls<br><i>n</i> = 128 | Boys<br><i>n</i> = 114 | <i>P</i> -value <sup>a</sup> |
|-------------------------------------------|-------------------------|------------------------|------------------------------|
| Age, years                                | 10.2 ± 1.7              | 10.4 ± 1.6             | 0.39                         |
| <i>Glycemia</i>                           |                         |                        |                              |
| Fasting glucose (mg/dL)                   | 86.3 ± 10.5             | 88.1 ± 7.8             | 0.13                         |
| Fasting C-peptide (ng/mL)                 | 1.8 ± 1.3               | 1.6 ± 1.2              | 0.11                         |
| CP-IR <sup>b</sup>                        | 0.41 ± 0.38             | 0.35 ± 0.26            | 0.17                         |
| Leptin (ng/mL)                            | 13.9 ± 10.2             | 8.3 ± 6.5              | <0.0001                      |
| <i>Lipid profile</i>                      |                         |                        |                              |
| Total cholesterol (mg/dL)                 | 159.3 ± 27.9            | 151.5 ± 28.8           | 0.05                         |
| HDL (mg/dL)                               | 57.7 ± 11.8             | 59.6 ± 12.1            | 0.25                         |
| LDL (mg/dL)                               | 82.1 ± 22.4             | 76.3 ± 24.0            | 0.08                         |
| Triglycerides (mg/dL)                     | 97.5 ± 47.8             | 77.7 ± 38.3            | 0.002                        |
| <i>Adiposity and blood pressure</i>       |                         |                        |                              |
| BMI z-score <sup>c</sup>                  | 0.82 ± 1.31             | 0.88 ± 1.19            | 0.63                         |
| Waist circumference (cm)                  | 71.5 ± 11.4             | 69.9 ± 10.0            | 0.35                         |
| SS+TR (mm)                                | 30.5 ± 12.1             | 25.4 ± 11.0            | 0.002                        |
| SBP (mmHg)                                | 102 ± 10                | 105 ± 10               | 0.02                         |
| DBP (mmHg)                                | 66 ± 7                  | 66 ± 7                 | 0.71                         |
| <i>Indicators of pubertal development</i> |                         |                        |                              |
| Pubic hair, Tanner stage >1               | 24.2% (31)              | 18.0% (20)             | 0.37                         |
| Breast, Tanner stage >1                   | 32.8% (42)              | --                     |                              |
| Testicles, Tanner stage >1                | --                      | 50.0% (55)             |                              |

<sup>a</sup> *P*-values are from an independent T-test for all variables except for pubic hair, which is from a Likelihood Ratio Chi-squared test.
